# Supplementary material for: Potential of Using Cell-Free DNA and miRNA in Breast Milk to Screen Early Breast Cancer
Source: PubMed Central journal article supplement (PMC7354639; doi:10.1155/2020/8126176), 2020-07-02
Supplement: 8126176.f1.pdf [file 8126176.f1.pdf]

1 Supplemental material for  
2 Potential of Using cell-free DNA and miRNA in breast milk to Study Breast Cancer  
3 Risk  
4 Qinghe Song, Yingying Zhang, Hongtao Liu, Yuguang Du

## 5 **Supplemental Text**

6 **Human donor breast milk samples collection.** Each donor was asked to provide at least 100  
7 mL of breast milk (BM) by pumping or hand expressing. Breast milk was processed for BM  
8 cells isolation within 2 h of collection using the protocol described behind. Whole BM for  
9 stability experiments were packed into 15 ml centrifuge tubes (JetBiofil) and stored at room  
10 temperature.

11 **Processing of milk samples and Isolation of BM cells and BM supernatant.** To separate  
12 the BM cells, fresh breast milk samples were centrifuged immediately on arrival at the  
13 laboratory at 1,500 G for 10 min in 15 mL plastic centrifuge tubes. After removal the milk fat  
14 by aspiration, the supernatant was transferred to new tubes, the cell pellet was washed in ~5  
15 mL PBS one time, then used for isolation of RNA via traditional TRIZol (Ambion) method,  
16 and extraction of genomic DNA (gDNA) via the QIAamp DNA mini kit (Qiagen). The newly  
17 transferred supernatant was centrifuged again at 10,000g at RT for 10 min, removed milk fat  
18 and collected BM supernatant for stability experiments and future extraction of cell-free  
19 nucleic acid. BM cfDNA was extracted using a cfDNA purification Kit (SummerBio). BM  
20 cfRNA isolation was carried out using a cfRNA purification Kit (SummerBio). All nucleic  
21 acid extraction processes are carried out following the manufacturer's procedure.

22 **Stability experiments of BM cells, cell-free DNA and miRNA.** For BM cells stability test,  
23 whole BM from donor 3 and 4 was packed by 10ml each into centrifuge tubes. After  
24 incubation for designed time at RT, BM cells were separated to isolate gDNA for detection.  
25 For cfDNA stability test, whole BM and BM supernatant from donor 1, 2, 3, 4 and 5 were  
26 packed by 2ml each into centrifuge tubes and incubation for designed time at RT, then  
27 isolated BM supernatant was used to extract cfDNA for detection of abundance by qRT-PCR.  
28 For cell-free miRNA stability test, 2ml of whole BM from donor 3 was incubated 7 days at RT,  
29 then isolated BM supernatant to extract cfRNA for generating NGS libraries of miRNA. All  
30 samples for incubation at RT were added with sodium azide at 0.05% final concentration as  
31 antimicrobial.

32 **Nucleic acid Extraction Procedures.** Isolation of cellular RNA via traditional TRIZol  
33 (Ambion) method, extraction of genomic DNA (gDNA) via the QIAamp DNA mini kit  
34 (Qiagen). BM cfDNA was extracted using a cfDNA purification Kit (SummerBio). BM  
35 cfRNA isolation was carried out using a cfRNA purification Kit (SummerBio). All nucleic  
36 acid extraction processes are carried out following the manufacturer's procedure.

37 **Measurement of cfDNA abundance in BM by Using qRT-PCR Assays.** To accurately  
38 measure abundance of cfDNA, quantitative real-time PCR method is designed. We choose  
39 human long interspersed nuclear elements (LINE) as target amplification region and designed  
40 forward primer (5' CAAGTCCTGAGTGACCTAC 3') and reverse primer (5'  
41 GTCTCGTTGATCTGTCTAATG 3'). Human DNA Standard (Thermo) was used to generate  
42 standard curve. cfDNA samples and diluted DNA standards were subjected to qRT-PCR as

43 follows: initial denaturation at 95 °C for 10 min, then (95 °C for 10 s, 60 °C for 20 s) x 40  
44 cycles, and default melt curve setting. Ct values of gradient standards were used to generate  
45 standard curve, to which concentrations of cfDNA samples were calculated according. Then  
46 concentration of cfDNA was normalized into ng cfDNA per milliliter of BM by converting  
47 sample volume of BM for extracting cfDNA and final elution volume

48 **Measurement of RNA difference between BM cellular RNA and BM cfRNA By Using**  
49 **RT-qPCR Assays.** RNA samples from different donors were subjected to RT-qPCR Assays to  
50 determine the difference of expression levels of LALBA, K-CSN, B-CSN, ELF5, TACSTD2  
51 and PPBP, CD99, ITGB3, RGS18, CD45. Reverse transcription was performed using  
52 SumScript 1st strand cDNA synthesis kit (SummerBio). qPCR analysis was carried out at a  
53 CFX connect Real-time PCR instrument (BioRad Laboratories) using SYBR QPCR Mixture  
54 (SummerBio). Forward and reverse primers listed in Table S1. Thermal cycling was set up as  
55 the following condition: 95 °C for 10 min, followed by 40 cycles of 10 s at 95 °C, 20 s at 60 °C,  
56 and default melt curve setting. The comparative Ct method ( $-\Delta Ct$ ) was used to determine the  
57 relative expression levels of each gene.  $-\Delta Ct$  was calculated by formula of  $-\left[Ct_{(\text{Target gene})}-\right.$   
58  $Ct_{(\text{GAPDH})}]$ .

59 **Whole Genome Bisulfite Sequencing (WGBS) Library Generation and NGS data**  
60 **analysis** were performed by LC Sciences (Houston, TX, USA). The brief process is as  
61 follows.

62 ***WGBS Library construction and sequencing.*** cfDNA and sonication-fragmented DNA  
63 samples were subjected to bisulfite conversion. The Accel-NGS Methyl-Seq DNA Library Kit  
64 (Swift, MI, USA) was utilized for attaching adapters to single-stranded DNA fragments.  
65 Briefly, the Adaptase step is a highly efficient, proprietary reaction that simultaneously  
66 performs end repair, tailing of 3' ends, and ligation of the first truncated adapter complement  
67 to 3' ends. The Extension step is used to incorporate truncated adapter 1 by a primer extension  
68 reaction. The Ligation step is used to add the second truncated adapter to the bottom strand  
69 only. The Indexing PCR step increases yield and incorporates full length adapters. Bead-based  
70 SPRI clean-ups are used to remove both oligonucleotides and small fragments, as well as to  
71 change enzymatic buffer composition. Finally, the pair-end 2×150bp sequencing was  
72 performed on an illumina Hiseq 4000 platform.

73 ***WGBS Bioinformatics analysis.*** Firstly, Cutadapt [1] and perl scripts in house were used to  
74 remove the reads that contained adapter contamination, low quality bases and undetermined  
75 bases. Then sequence quality was verified using FastQC (<http://www.bioinformatics.babraham.ac.uk/projects/fastqc/>). Reads that passed quality control were mapped to reference  
76 genome using WALT [2]. After alignment, reads were further deduplicated using samtool [3].  
77 For each cytosine site (or guanine corresponding to a cytosine on the opposite strand) in the  
78 reference genome sequence, the DNA methylation level was determined by the ratio of the  
79 number of reads supporting C (methylated) to that of total reads (methylated and  
80 unmethylated) using per scripts in house and MethPipe [4]. Differentially methylated regions  
81 (DMRs) were calculated by R package-MethylKit [5] with default parameters (1000 bp slide  
82 windows, 500 bp overlap, p value < 0.05).

84 **Whole Genome Sequencing(WGS) Library Generation and NGS data analysis for**  
85 **cfDNA.** cfDNA samples were directly used for WGS library generation by utilizing NEBNext  
86 Ultra DNA Library Prep Kit for Illumina (NEB #E7370) according to manufacturer's

87 recommended protocol. After passing the quality control, libraries were subjected to the  
88 pair-end 2×150bp sequencing on an illumina Hiseq 4000 platform. Alignment analysis for  
89 raw reads were processed by the Burrows-Wheeler Aligner software to simply determine the  
90 chromosomal origin of each sequenced DNA fragments. we counted only sequences that  
91 could be mapped to just one location in the hg19 reference human genome with no mismatch  
92 [6]. To reduce GC bias introduced by the PCR process, we applied weight to each sequenced  
93 read based on the local genomic GC content of large regions of the human genome with  
94 relatively homogeneous GC content [7]. We first got the read count for bins of size of 500kb,  
95 then averaged the counts in each 0.5% of GC content bin. Counts in each GC content bin is  
96 weighted by  $W_i = \bar{M} / M_i$ , where  $\bar{M}$  is the average counts across all GC content bins, and  
97  $M_i$  is the average count in bin i. Counts ratio is normalized by *500kb bin counts/ all counts*,  
98 and a reference baseline of mean of counts ratios based on a set of normal diploid cfDNAs  
99 was created. Copy number of cfDNA samples was calculated by *sample counts ratios/*  
100 *reference mean of counts ratios*, which was further plotted into genome-wide copy number for  
101 data visualization using ggplot2 [8]. Z-score was calculated based on the same reference data  
102 set by referring to previous reports [9].

103 **miRNA Sequencing and Bioinformatics analysis.** Service of miRNA library generation and  
104 NGS data analysis was provided by LC Sciences (Houston, Texas, USA). In brief, miRNA  
105 library was prepared by TruSeq Small RNA Sample Prep Kits (Illumina) and single-end  
106 sequencing (36 bp or 50 bp) was performed on an Illumina Hiseq 2500 following the vendor's  
107 recommended protocol. Raw reads were subjected to the Illumina pipeline filter (Solexa 0.3),  
108 and then the dataset was further processed with an in-house program, ACGT101-miR (LC  
109 Sciences) to remove adapter dimers, junk, low complexity, common RNA families (rRNA,  
110 tRNA, snRNA, snoRNA) and repeats. Subsequently, unique sequences with length in 18~26  
111 nucleotide were mapped to human species precursors in miRBase 22.0 by BLAST search to  
112 identify known miRNAs and novel 3p- and 5p- derived miRNAs. Length variation at both 3.  
113 and 5. ends and one mismatch inside of the sequence were allowed in the alignment. The  
114 unique sequences mapping to human species mature miRNAs in hairpin arms were identified  
115 as known miRNAs. The unique sequences mapping to the other arm of known human species  
116 precursor hairpin opposite to the annotated mature miRNA-containing arm were considered to  
117 be novel 5p- or 3p- derived miRNA candidates. The remaining sequences were mapped to  
118 other selected species precursors (with the exclusion of human species) in miRBase 22.0 by  
119 BLAST search, and the mapped pre-miRNAs were further BLASTed against the human  
120 species genomes to determine their genomic locations. The above two we defined as known  
121 miRNAs.

122 **Supplementary Figures**

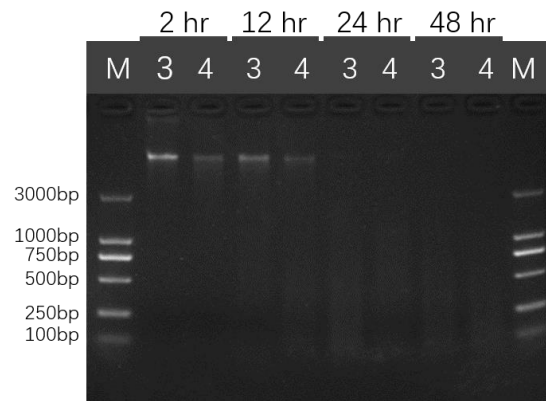

123

124 **Figure S1:** genomic DNA (gDNA) of BM cells was easily degraded when BM was stored at  
125 room temperature. 10mL of Whole BM samples (from donor 3 and 4) were incubated at room  
126 temperature for indicated time, then BM cells was isolated and gDNA was extracted detected  
127 by agarose gel electrophoresis.

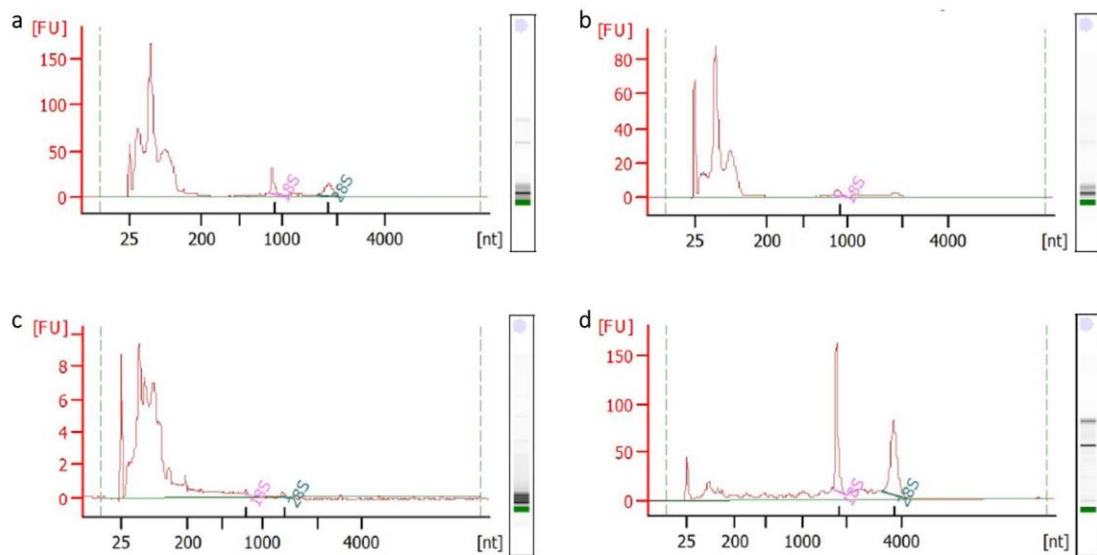

128

129 **Figure S2:** Identification of existence and stability of cfRNA in human BM. (a) cfRNA  
130 extracted from fresh BM samples; (b) cfRNA extracted from RT-2-days BM sample; (c)  
131 cfRNA extracted from RT-7-days BM sample; (d) Total RNA isolated from fresh BM cells.  
132 RNA and cfRNA were detected by Agilent 2100 Bioanalyzer. The BM samples used in this  
133 experiment are from donor 3.

134

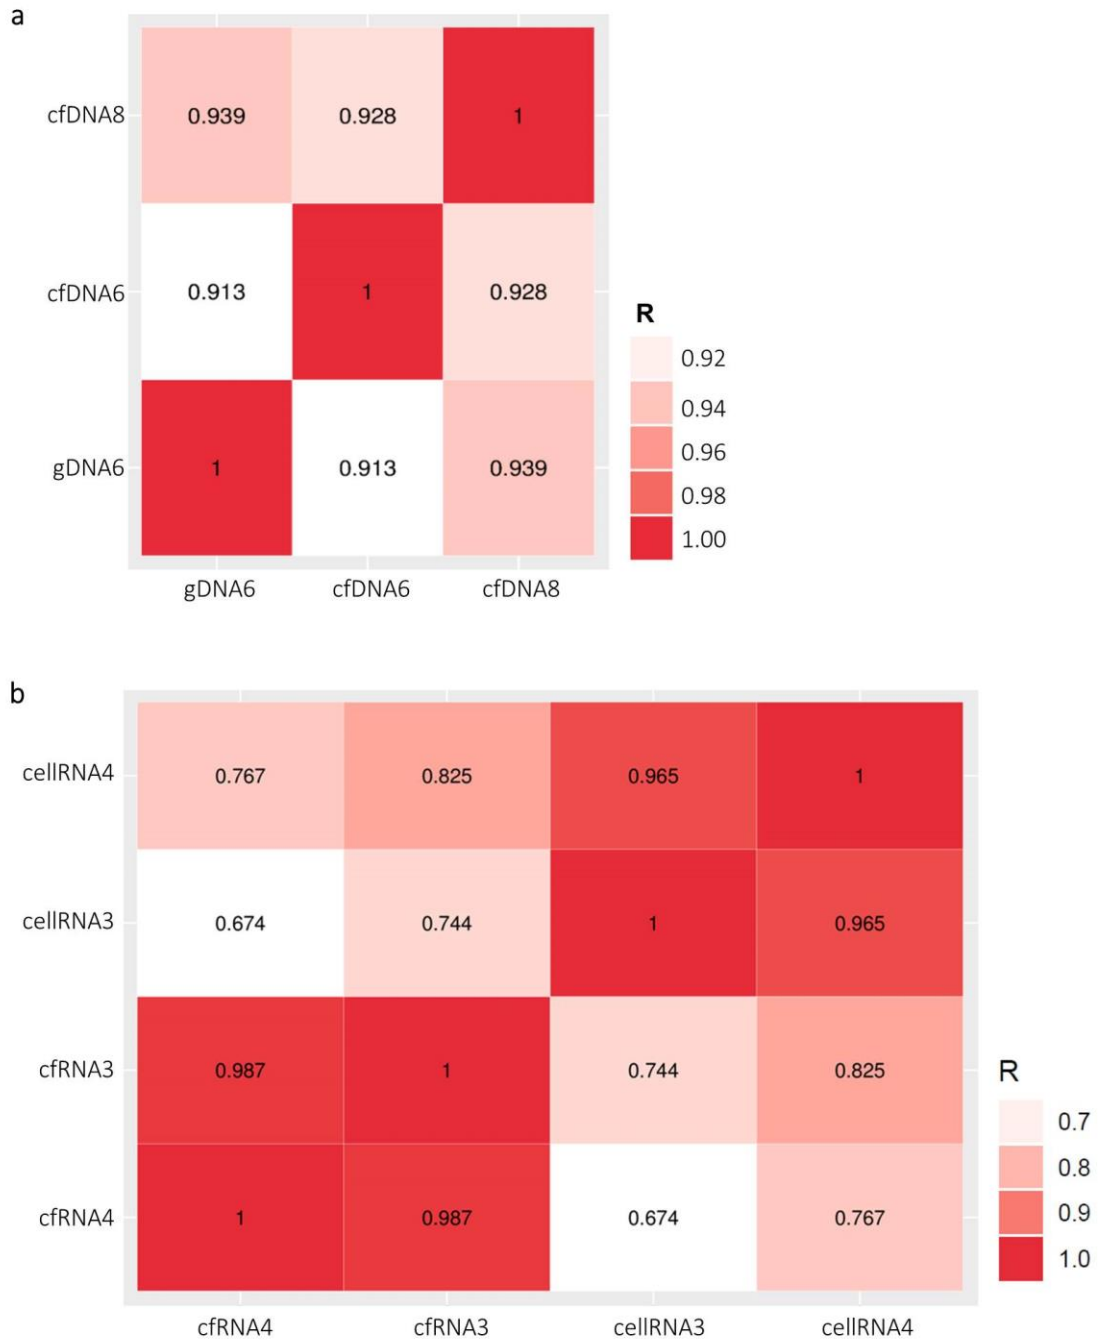

135

136 **Figure S3:** Pearson correlation between samples. (A) Pearson correlation of methylation  
 137 between indicated samples according to data of Whole Genome Bisulfite Sequencing  
 138 (WGBS). (B) Pearson correlation of miRNA abundance profiles between indicated samples  
 139 according to the normalized reads of 413 identical known human miRNAs detectable in all  
 140 samples.

141 **Supplementary Tables**

142 **Table S1:** Forward and reverse primers used in real-time PCR.

| Genes | Forward primers | Reverse primers |
|-------|-----------------|-----------------|
|-------|-----------------|-----------------|

|         |                        |                       |
|---------|------------------------|-----------------------|
| LALBA   | CCTGGATGATGACATTACTGA  | ACACTCACAACCTTCTCACAA |
| B-CSN   | GAGGATGAACACCAGGATAA   | TGAGCAAGAGGCAGAATG    |
| K-CSN   | ATTCTCAGCGGCAATAC      | GTTCAACAGTAGCAATGG    |
| ELF5    | ACTTCCACAGACATCCTTC    | ATGCCAGCCATCAGTTAG    |
| TACSTD2 | CACGCTTCCTGATTCCTC     | AATGCTTCCTTCAAGACAGA  |
| PPBP    | TAGACAGTGACTTGTATGCT   | ATCCTTCAGTGTGGCTATC   |
| RGS18   | GACACATTCATCTCTACAGAAC | CGGTGATAAGGTAGTCTACTT |
| ITGB3   | TTAGCAGCCAGTCTTGAAG    | AGAGAATCTTAACCGCACAT  |
| CD99    | ATAGAAGATTGTCCGGCAGAA  | CAAAGCACATCGCAAGATT   |
| CD45    | TGCTCAGAATGGACAAGTAA   | ACCTTCAGCCTGTTCCTT    |
| GAPDH   | TCTCTGCTCCTCCTGTTC     | GACTCCGACCTTCACCTT    |

143 LALBA: lactalbumin, alpha; B-CSN: casein beta; K-CSN: casein kappa; ELF5: E74-like factor 5;  
144 TACSTD2: tumor-associated calcium signal transducer 2; SPP1: secreted phosphoprotein 1; ELF5:  
145 E74-like factor 5; PPBP: pro-platelet basic protein; RGS18: regulator of G-protein signaling 18; ITGB3:  
146 integrin, beta 3; CD99: Cluster of differentiation 99; CD45: Cluster of differentiation 45; GAPDH:  
147 glyceraldehyde-3-phosphate dehydrogenase.

148 **Table S2: Partial data of normalized reads of detectable miRNAs in all samples.**

| miRNA name                  | miRNA sequence          | Normalized reads |           |           |           |
|-----------------------------|-------------------------|------------------|-----------|-----------|-----------|
|                             |                         | cfRNA4           | cfRNA3    | cellRNA3  | cellRNA4  |
| hsa-miR-1-3p                | TGGAATGTAAAGAAGTATGTAT  | 13.84            | 40.95     | 32.43     | 15.32     |
| hsa-let-7f-5p               | TGAGGTAGTAGATTGTATAGTT  | 73829.24         | 39642.02  | 169680.29 | 251397.85 |
| hsa-let-7f-1-3p_R-1_1ss21CT | CTATACAATCTATTGCCTTCT   | 142.51           | 127.52    | 245.32    | 132.35    |
| hsa-let-7d-5p               | AGAGGTAGTAGTTGCATAGTT   | 23649.91         | 16202.40  | 15598.37  | 19948.15  |
| hsa-let-7d-3p_R-2           | CTATACGACCTGCTGCCTTT    | 10422.37         | 12390.31  | 4978.73   | 3429.99   |
| hsa-let-7e-5p               | TGAGGTAGGAGTTGTATAGTT   | 11059.61         | 3558.48   | 3586.36   | 10139.19  |
| hsa-let-7e-3p_R-2           | CTATACGGCCTCCTAGCTTT    | 89.93            | 108.80    | 91.17     | 89.16     |
| hsa-let-7a-5p               | TGAGGTAGTAGTTGTATAGTT   | 69874.08         | 57908.58  | 83430.84  | 129086.21 |
| hsa-let-7a-3p_R-1           | CTATACAATCTACTGTCTTT    | 253.42           | 427.21    | 932.40    | 470.43    |
| hsa-miR-7-5p                | TGGAAGACTAGTGATTTGTGTGT | 303.00           | 168.85    | 732.19    | 2653.07   |
| hsa-let-7i-5p               | TGAGGTAGTAGTTTGTGCTGTT  | 10651.35         | 8548.39   | 36036.83  | 72137.46  |
| hsa-let-7i-3p               | CTGCGCAAGCTACTGCCTTGCT  | 318.22           | 445.73    | 1184.29   | 759.98    |
| hsa-let-7c-5p               | TGAGGTAGTAGTTGTATGGTT   | 2273.01          | 2554.75   | 2570.07   | 2421.30   |
| hsa-let-7g-5p               | TGAGGTAGTAGTTGTACAGTT   | 95427.35         | 76654.95  | 254574.04 | 418970.55 |
| hsa-let-7g-3p_R-1           | CTGTACAGCCACTGCCTTG     | 193.70           | 63.17     | 276.34    | 149.07    |
| hsa-let-7b-5p               | TGAGGTAGTAGTTGTGTGGTT   | 82701.24         | 116853.47 | 81207.83  | 48586.97  |
| hsa-let-7b-3p_R-1_1ss21CT   | CTATACAACCTACTGCCTTCT   | 3748.07          | 2484.85   | 1170.19   | 601.85    |
| hsa-miR-7-1-3p              | CAACAAATCACAGTCTGCCATA  | 135.59           | 166.12    | 166.37    | 216.64    |
| hsa-let-7f-2-3p_1ss22CT     | CTATACAGTCTACTGTCTTCT   | 5.07             | 1.95      | 142.87    | 85.91     |
| hsa-miR-9-5p                | TCTTTGGTTATCTAGCTGTATGA | 271.64           | 224.62    | 318.00    | 137.23    |
| hsa-miR-10a-5p_R-1          | TACCCTGTAGATCCGAATTTGT  | 18065.16         | 11759.74  | 4595.25   | 8784.65   |
| hsa-miR-10b-5p_R-1          | TACCCTGTAGAACCGAATTTGT  | 182.63           | 122.84    | 69.55     | 87.77     |
| hsa-miR-15a-5p              | TAGCAGCACATAATGGTTTGTG  | 135.59           | 272.58    | 1843.17   | 1779.78   |
| hsa-miR-15b-5p              | TAGCAGCACATCATGGTTTACA  | 1285.33          | 827.11    | 2492.66   | 2148.97   |

|                        |                         |           |            |            |           |
|------------------------|-------------------------|-----------|------------|------------|-----------|
| hsa-miR-15b-3p_R-1     | CGAATCATTATTTGCTGCTCT   | 59.49     | 63.17      | 216.18     | 376.85    |
| hsa-miR-16-5p          | TAGCAGCACGTAAATATTGGCG  | 7283.76   | 7890.33    | 12244.75   | 13131.01  |
| hsa-miR-16-2-3p_L+1R-1 | ACCAATATTACTGTGCTGCTTT  | 221.37    | 391.91     | 563.95     | 693.80    |
| hsa-miR-17-5p          | CAAAGTGCTTACAGTGCAGGTAG | 1691.40   | 1989.98    | 7665.48    | 6633.94   |
| hsa-miR-17-3p          | ACTGCAGTGAAGGCACTTGTAG  | 134.21    | 116.99     | 531.05     | 475.07    |
| hsa-miR-18a-5p         | TAAGTGTCATCTAGTGCAGATAG | 81.63     | 91.25      | 794.23     | 714.00    |
| hsa-miR-19b-3p_R-1     | TGTGCAAATCCATGCAAAACTG  | 549.97    | 624.14     | 3133.21    | 3018.31   |
| hsa-miR-19a-3p         | TGTGCAAATCTATGCAAACTGA  | 196.47    | 291.30     | 1393.89    | 1409.19   |
| hsa-miR-20a-5p         | TAAAGTGCTTATAGTGCAGGTAG | 4964.22   | 3870.00    | 31801.10   | 31943.72  |
| hsa-miR-20a-3p         | ACTGCATTATGAGCACTTAAAG  | 16.60     | 24.57      | 155.09     | 113.54    |
| hsa-miR-21-5p          | TAGCTTATCAGACTGATGTTGA  | 167597.73 | 225676.62  | 1216907.49 | 773411.75 |
| hsa-miR-21-3p_R+1      | CAACACCAGTCGATGGGCTGTC  | 123.14    | 188.35     | 2935.36    | 2381.63   |
| hsa-miR-22-5p_R-1      | AGTTCTTCAGTGGCAAGCTTT   | 3782.66   | 5124.12    | 3181.61    | 2292.47   |
| hsa-miR-22-3p          | AAGCTGCCAGTTGAAGAAGTGT  | 161231.96 | 171429.96  | 128999.63  | 88835.69  |
| hsa-miR-23a-5p_R-1     | GGGGTTCCTGGGGATGGGATT   | 19.37     | 104.12     | 9.40       | 9.75      |
| hsa-miR-23a-3p_R-1     | ATCACATTGCCAGGGATTTC    | 3745.99   | 4037.88    | 32975.05   | 25369.68  |
| hsa-miR-23b-3p_R-5     | ATCACATTGCCAGGGATT      | 729.83    | 697.84     | 3237.07    | 1712.21   |
| hsa-miR-24-3p_R-2      | TGGCTCAGTTCAGCAGGAAC    | 3255.52   | 4550.88    | 15252.95   | 7701.11   |
| hsa-miR-24-2-5p_L+1R-1 | GTGCCTACTGAGCTGAAACACA  | 224.14    | 331.08     | 775.90     | 807.34    |
| hsa-miR-25-5p_R+2      | AGGCGGAGACTTGGCAATTGCT  | 34.59     | 42.12      | 28.20      | 43.19     |
| hsa-miR-25-3p          | CATTGCACTGTCTCGGTCTGA   | 24937.31  | 34049.67   | 24623.90   | 23471.49  |
| hsa-miR-26b-5p_R+1     | TTCAAGTAATTCAGGATAGGTT  | 37110.81  | 43039.89   | 98969.64   | 81495.06  |
| hsa-miR-26b-3p         | CCTGTTCTCCATTACTTGGCT   | 114.84    | 70.19      | 112.79     | 137.23    |
| hsa-miR-26a-5p         | TTCAAGTAATTCAGGATAGGCT  | 60712.99  | 45029.88   | 117750.56  | 109287.12 |
| hsa-miR-26a-2-3p_R-1   | CCTATTCTTGATTACTTGTIT   | 34.59     | 24.57      | 179.52     | 94.04     |
| hsa-miR-27a-5p         | AGGGCTTAGCTGCTTGTGAGCA  | 85.78     | 104.12     | 578.05     | 822.67    |
| hsa-miR-27a-3p_R-1     | TTCACAGTGGCTAAGTTCGG    | 4813.64   | 12190.85   | 79125.52   | 29570.33  |
| hsa-miR-27b-3p_R-1     | TTCACAGTGGCTAAGTTCGT    | 2902.94   | 3878.77    | 17108.50   | 7536.25   |
| hsa-miR-28-5p_R-1      | AAGGAGCTCACAGTCTATTGA   | 2992.18   | 2159.03    | 5951.70    | 4937.64   |
| hsa-miR-28-3p          | CACTAGATTGTGAGCTCCTGGA  | 6856.93   | 4332.11    | 1423.03    | 5482.83   |
| hsa-miR-29a-3p_R-1     | TAGCACCATCTGAAATCGGTT   | 65680.20  | 92681.09   | 207835.42  | 98081.72  |
| hsa-miR-29b-3p_R-3     | TAGCACCATTTGAAATCAGT    | 2256.36   | 3032.36    | 5154.10    | 2840.22   |
| hsa-miR-29c-5p_R-1     | TGACCGATTTCCTCGGTGTT    | 672.41    | 541.66     | 1325.28    | 1090.85   |
| hsa-miR-29c-3p_R-1     | TAGCACCATTTGAAATCGGTT   | 2998.87   | 5932.52    | 15753.37   | 7486.56   |
| hsa-miR-29b-2-5p_R+1   | CTGGTTTCACATGGTGGCTTAGA | 358.34    | 604.83     | 568.65     | 1151.46   |
| hsa-miR-30b-5p         | TGTAAACATCCTACACTCAGCT  | 383302.82 | 264658.95  | 372313.79  | 346934.96 |
| hsa-miR-30b-3p_R-2     | CTGGGAGGTGGATGTTTACT    | 478.71    | 377.87     | 203.96     | 172.06    |
| hsa-miR-30c-5p_R+1     | TGTAAACATCCTACACTCAGCT  | 54995.42  | 46195.28   | 42790.74   | 47149.16  |
| hsa-miR-30c-2-3p_R-2   | CTGGGAGAAGGCTGTTTACT    | 80.25     | 46.80      | 146.63     | 242.41    |
| hsa-miR-30a-5p         | TGTAAACATCCTCGACTGGAAG  | 143946.44 | 97103.28   | 178924.64  | 183650.88 |
| hsa-miR-30a-3p_1ss22CT | CTTTCAGTCGATGTTTGAGT    | 3262.44   | 3162.80    | 3578.73    | 5698.78   |
| hsa-miR-30d-5p         | TGTAAACATCCCCGACTGGAAG  | 3694759.6 | 2510709.18 | 1131940.55 | 1230804.8 |
| hsa-miR-30d-3p_R-2     | CTTTCAGTCAGATGTTTGCT    | 1120.68   | 1056.41    | 1885.94    | 1538.41   |
| hsa-miR-30e-5p_R+2     | TGTAAACATCCTTACTGGAAGCT | 63270.96  | 44668.19   | 92393.68   | 156105.41 |

|                              |                         |           |           |           |          |
|------------------------------|-------------------------|-----------|-----------|-----------|----------|
| hsa-miR-30e-3p_1ss22CT       | CTTTCAGTCGGATGTTTACAGT  | 2883.34   | 4249.63   | 4055.73   | 9630.66  |
| hsa-miR-32-5p_R-2            | TATTGCACATTACTAAGTTG    | 408.15    | 1109.06   | 3934.49   | 1496.27  |
| hsa-miR-32-3p_R-1            | CAATTTAGTGTGTGTGATATT   | 42.89     | 64.34     | 143.81    | 128.17   |
| hsa-miR-33a-3p_R-1           | CAATGTTTTCCACAGTGCATCA  | 15.22     | 26.91     | 121.25    | 107.27   |
| hsa-miR-33b-3p_R-1           | CAGTGCCTCGGCAGTGCAGCC   | 304.38    | 214.09    | 86.47     | 71.75    |
| hsa-miR-34a-5p_R+1           | TGGCAGTGTCTTAGCTGGTTGTT | 95.47     | 113.48    | 1263.25   | 1480.94  |
| hsa-miR-92b-3p_R-2           | TATTGCACTCGTCCCGGCT     | 3241.68   | 2805.40   | 802.06    | 544.03   |
| hsa-miR-92a-1-5p             | AGGTTGGGATCGGTTGCAATGCT | 24.90     | 65.51     | 25.38     | 34.83    |
| hsa-miR-92a-3p               | TATTGCACTTGTCCCGGCTGT   | 71133.05  | 52695.39  | 36107.63  | 24183.40 |
| hsa-miR-93-5p                | CAAAGTGCTTTCGTGCAGGTAG  | 7586.07   | 6588.83   | 12813.87  | 14362.22 |
| hsa-miR-93-3p_R+1            | ACTGCTGAGCTAGCACTCCCGA  | 166.03    | 277.26    | 158.85    | 137.92   |
| hsa-miR-96-5p_R-2            | TTTGGCACTAGCACATTTTTG   | 12768.89  | 12150.49  | 16593.27  | 26239.02 |
| hsa-miR-98-5p                | TGAGGTAGTAAGTTGTATTGTT  | 2425.25   | 1655.57   | 5080.95   | 7802.61  |
| hsa-miR-98-3p_L-1R+1_1ss22CT | TATACAACCTACTACTTTCCCTT | 52.58     | 93.59     | 89.29     | 60.60    |
| hsa-miR-99a-5p_R-1           | AACCCGTAGATCCGATCTTGT   | 161476.85 | 114593.15 | 62097.86  | 45214.04 |
| hsa-miR-99a-3p_R+1           | CAAGCTCGCTTCTATGGGTCTGA | 98.23     | 87.74     | 112.79    | 80.80    |
| hsa-miR-99b-5p               | CACCCGTAGAACCAGCTTGCG   | 220722.34 | 112993.91 | 19611.33  | 48173.84 |
| hsa-miR-99b-3p_R-2           | CAAGCTCGTGTCTGTGGGTC    | 864.73    | 765.11    | 423.90    | 803.86   |
| hsa-miR-100-5p               | AACCCGTAGATCCGAACCTGTG  | 11176.41  | 5719.60   | 2669.83   | 4109.16  |
| hsa-miR-101-5p_L+1R-2        | TCAGTTATCACAGTGTGATG    | 8.30      | 8.19      | 55.46     | 20.20    |
| hsa-miR-101-3p_R+1           | TACAGTACTGTGATAACTGAAG  | 16836.56  | 29211.00  | 136941.91 | 79067.46 |
| hsa-miR-103a-2-5p            | AGCTTCTTTACAGTGTGCCTTG  | 35.97     | 7.02      | 52.64     | 43.19    |
| hsa-miR-103a-3p              | AGCAGCATTGTACAGGGCTATGA | 38637.80  | 22561.93  | 35255.44  | 76849.76 |
| hsa-miR-106b-5p              | TAAAGTGCTGACAGTGCAGAT   | 909.00    | 2044.97   | 8091.73   | 5302.42  |
| hsa-miR-106b-3p_L+2R-2       | TACCGCACTGTGGTACTTGCT   | 2252.44   | 2146.75   | 1731.32   | 2544.63  |
| hsa-miR-106a-5p_1ss1AC       | CAAAGTGCTTACAGTGCAGGTAG | 1691.40   | 1989.98   | 7665.48   | 6633.94  |
| hsa-miR-107_R-2              | AGCAGCATTGTACAGGGCTAT   | 2940.53   | 3355.25   | 6352.57   | 5061.63  |
| hsa-miR-125b-5p_R-1          | TCCCTGAGACCCTAACTTGTTG  | 29145.42  | 29130.87  | 18317.07  | 8758.18  |
| hsa-miR-125b-2-3p_L-2        | ACAAGTCAGGCTCTTGGGAC    | 936.67    | 560.38    | 443.64    | 335.75   |
| hsa-miR-125a-5p_R-1          | TCCCTGAGACCCTTAACTGTG   | 142400.31 | 113799.96 | 35452.67  | 40911.92 |
| hsa-miR-125a-3p_R-1          | ACAGGTGAGGTTCTTGGGAGC   | 799.70    | 659.82    | 62.97     | 93.34    |
| hsa-miR-125b-1-3p            | ACGGGTTAGGCTCTTGGGAGCT  | 9.68      | 24.57     | 10.34     | 9.75     |

149 **Table S3:** Partial data of normalized reads of miRNAs that only detectable in partial samples.

| miRNA name             | miRNA sequence          | Normalized reads |        |          |          |
|------------------------|-------------------------|------------------|--------|----------|----------|
|                        |                         | cfRNA4           | cfRNA3 | cellRNA3 | cellRNA4 |
| hsa-miR-15a-3p_1ss22AT | CAGGCCATATTGTGCTGCCTCT  | 0                | 0      | 4.70     | 0        |
| hsa-miR-18b-5p_R-4     | TAAGGTGCATCTAGTGCAG     | 0                | 0      | 3.76     | 0        |
| hsa-miR-23b-5p_L-1R-3  | GGTTCTCGCATGCTGA        | 0                | 23.40  | 0        | 0        |
| hsa-miR-26a-1-3p_R+1   | CCTATTCTTGTTACTTGCACGA  | 0                | 9.36   | 4.70     | 3.48     |
| hsa-miR-29b-1-5p_L-1   | CTGGTTTCATATGGTGGTTAGA  | 0                | 16.38  | 0        | 13.24    |
| hsa-miR-31-3p_R+1      | TGCTATGCCAACATAATGCCATC | 0                | 0      | 12.22    | 17.41    |
| hsa-miR-33b-5p_R-1     | GTGCATTGCTGTTGCATTG     | 0                | 14.04  | 136.29   | 27.17    |



|                               |                           |   |       |       |       |
|-------------------------------|---------------------------|---|-------|-------|-------|
| hsa-miR-34c-3p                | AATCACTAACCACACGGCCAGG    | 0 | 5.85  | 0     | 0     |
| hsa-mir-96-p3                 | TGTGTCTCTCCGCTCTGAG       | 0 | 8.19  | 0     | 3.48  |
| hsa-mir-106a-p3               | ACTGCAATGTAAGCACTTCT      | 0 | 0     | 0     | 9.06  |
| hsa-miR-129-5p                | CTTTTTGCGGTCTGGGCTTGC     | 0 | 4.09  | 0     | 0     |
| hsa-miR-139-5p                | TCTACAGTGACGTGTCTCCAGT    | 0 | 9.36  | 21.62 | 10.45 |
| hsa-miR-146a-3p_L+2R-3        | GACCTCTGAAATTCAGTTCTT     | 0 | 0     | 15.04 | 16.02 |
| hsa-miR-147b-5p               | TGGAAACATTTCTGCACAAACT    | 0 | 0     | 9.40  | 34.13 |
| hsa-miR-147b-3p               | GTGTGCGGAAATGCTTCTGCT     | 0 | 7.02  | 59.21 | 62.69 |
| hsa-miR-150-3p_R-1            | CTGGTACAGGCCTGGGGGACA     | 0 | 14.04 | 15.04 | 9.75  |
| hsa-miR-155-3p                | CTCCTACATATTAGCATTAACA    | 0 | 0     | 4.70  | 4.18  |
| hsa-miR-186-3p_L-2R+1         | CCAAAGGTGAATTTTTTGGGA     | 0 | 0     | 0     | 9.06  |
| hsa-miR-188-5p_R+1            | CATCCCTTGCATGGTGGAGGGT    | 0 | 0     | 6.58  | 0     |
| hsa-miR-190a-3p_L+1           | ACTATATATCAAACATATTCCT    | 0 | 0     | 45.12 | 34.13 |
| hsa-miR-192-3p_R+1            | CTGCCAATTCATAGGTCACAGT    | 0 | 0     | 0     | 4.18  |
| hsa-miR-194-3p                | CCAGTGGGGCTGCTGTATCTG     | 0 | 0     | 0     | 6.97  |
| hsa-miR-196b-3p               | TCGACAGCACGACACTGCCTTC    | 0 | 0     | 7.52  | 0     |
| hsa-miR-205-3p_L-1R+1         | ATTTTCAGTGGAGTGAAGTTCA    | 0 | 12.87 | 12.22 | 0     |
| hsa-miR-219b-5p               | AGATGTCCAGCCACAATTCTCG    | 0 | 14.04 | 0     | 0     |
| hsa-mir-222-p5                | AAGGTGTAGGTACCCTCAAT      | 0 | 0     | 7.52  | 16.02 |
| hsa-miR-301a-5p               | GCTCTGACTTTATTGCACTACT    | 0 | 0     | 0     | 16.02 |
| hsa-miR-301b-3p               | CAGTGAATGATATTGTCAAAGC    | 0 | 0     | 4.70  | 0     |
| hsa-miR-338-3p_R+1            | TCCAGCATCAGTGATTTTGTGA    | 0 | 0     | 11.28 | 79.41 |
| hsa-miR-371b-5p               | ACTCAAAAGATGGCGGCACTTT    | 0 | 0     | 0     | 6.27  |
| hsa-miR-377-3p_R-2            | ATCACACAAAGGCAACTTTT      | 0 | 0     | 0     | 4.88  |
| hsa-miR-378b_R+3_1ss14GT      | ACTGGACTTGGAGTCAGAAAGA    | 0 | 0     | 4.70  | 0     |
| hsa-miR-379-5p                | TGGTAGACTATGGAACGTAGG     | 0 | 0     | 0     | 3.48  |
| hsa-miR-379-3p_1ss22TA        | TATGTAACATGGTCCACTAACA    | 0 | 7.02  | 0     | 0     |
| hsa-miR-382-3p_R+1            | AATCATTCACGGACAACACTTT    | 0 | 0     | 0     | 4.18  |
| hsa-miR-409-3p_L+1            | CGAATGTGTCTCGGTGAACCCCT   | 0 | 0     | 0     | 6.27  |
| hsa-miR-410-3p                | AATATAACACAGATGGCCTGT     | 0 | 0     | 0     | 4.88  |
| hsa-miR-422a_1ss10AG          | ACTGGACTTGGGGTCAGAAGGC    | 0 | 0     | 0     | 3.48  |
| hsa-miR-449c-5p_L-1R+1        | AGGCAGTGTATTGCTAGCGGCTGTT | 0 | 0     | 0     | 13.24 |
| hsa-miR-450a-1-3p             | ATTGGGAACATTTTGCATGTAT    | 0 | 0     | 4.70  | 4.88  |
| hsa-miR-489-3p_R-1            | GTGACATCACATATACGGCAG     | 0 | 0     | 12.22 | 0     |
| hsa-miR-499a-3p_L+1R-4_1ss5AG | GAACGTCACAGCAAGTCTG       | 0 | 7.02  | 4.70  | 0     |
| hsa-miR-512-5p_L-1R-1         | ACTCAGCCTTGAGGGCACTTT     | 0 | 0     | 9.40  | 0     |
| hsa-miR-514a-3p               | ATTGACACTTCTGTGAGTAGA     | 0 | 0     | 9.87  | 4.88  |
| hsa-miR-515-3p                | GAGTGCCTTCTTTTGGAGCGTT    | 0 | 0     | 0     | 3.48  |
| hsa-miR-518d-5p_R-1           | CTCTAGAGGGAAGCACTTTCT     | 0 | 3.01  | 3.09  | 0     |
| hsa-miR-520c-3p               | AAAGTGCTTCCTTTTAGAGGGT    | 0 | 0     | 15.15 | 4.18  |
| hsa-miR-518e-3p_R-1           | AAAGCGCTTCCTTCAGAGT       | 0 | 11.70 | 24.44 | 3.48  |
| hsa-miR-518f-5p_R-1           | CTCTAGAGGGAAGCACTTTCT     | 0 | 3.01  | 3.09  | 0     |
| hsa-miR-520b-3p_R+1           | AAAGTGCTTCCTTTTAGAGGGT    | 0 | 0     | 15.15 | 4.18  |
| hsa-miR-519e-5p_R-3           | TTCTCCAAAAGGGAGCACT       | 0 | 0     | 4.70  | 0     |

|                        |                        |   |       |       |       |
|------------------------|------------------------|---|-------|-------|-------|
| hsa-miR-520a-5p_R-2    | CTCCAGAGGGAAGTACTTT    | 0 | 10.53 | 26.32 | 6.97  |
| hsa-miR-520a-3p_R-2    | AAAGTGCTTCCTTTGGACT    | 0 | 16.38 | 15.98 | 22.29 |
| hsa-miR-520d-3p_R+1    | AAAGTGCTTCTTTGGTGGGTT  | 0 | 0     | 6.58  | 0     |
| hsa-miR-539-3p_L-2R+2  | CATACAAGGACAATTTCTTTTT | 0 | 15.21 | 0     | 0     |
| hsa-miR-545-5p         | TCAGTAAATGTTTATTAGATGA | 0 | 0     | 0     | 4.18  |
| hsa-miR-548v           | AGCTACAGTTACTTTTGCACCA | 0 | 0     | 10.34 | 14.63 |
| hsa-mir-548n-p3        | CAATTACTTTTGCACCAACC   | 0 | 0.88  | 0     | 0     |
| hsa-mir-548p-p5_1ss3TG | AAGTAATTGCAGTTTTTGTC   | 0 | 0     | 0     | 4.18  |
| hsa-mir-548f-1-p5      | TTAGGTTGGTGCAAAAGTAAT  | 0 | 0.34  | 0.47  | 0     |
| hsa-miR-548b-5p_R-1    | AAAAGTAATTGTGGTTTTGGC  | 0 | 0     | 0.67  | 4.88  |
| hsa-miR-548i_R-2       | AAAAGTAATTGCGGATTTTG   | 0 | 0     | 0     | 1.74  |
| hsa-miR-548ah-5p       | AAAAGTGATTGCAGTGTTTG   | 0 | 0     | 4.70  | 0     |
| hsa-miR-548e-5p_L-1R-1 | AAAAGCAATCGCGTTTTTG    | 0 | 8.19  | 0     | 9.06  |
| hsa-mir-548f-4-p5      | TTAGGTTGGTGCAAAAGTAAT  | 0 | 0.34  | 0.47  | 0     |

150 **Table S4:** Previous reported microRNAs dysregulated in breast cancer were listed and  
151 compared with our miRNA basal abundance data. The inferential expression changes of  
152 miRNAs in early breast cancer (BC) are analyzed according to reports and our miRNA  
153 sequencing data.

| miRNA name                | miRNA sequence          | normalized reads |        |          |          | Reported Expression in Breast cancer (BC) |                  | Inferential Expression in early BC |
|---------------------------|-------------------------|------------------|--------|----------|----------|-------------------------------------------|------------------|------------------------------------|
|                           |                         | cfRNA4           | cfRNA3 | cellRNA3 | cellRNA4 | Results                                   | Opposite Results |                                    |
| hsa-let-7e-3p_R-2         | CTATACGGCCTCCTAGCTTT    | 90               | 109    | 91       | 89       | upregulated                               | downregulated    | upregulated                        |
| hsa-let-7a-5p             | TGAGGTAGTAGGTTGTATAGTT  | 69874            | 57909  | 83431    | 129086   | upregulated                               | downregulated    | downregulated                      |
| hsa-let-7c-5p             | TGAGGTAGTAGGTTGTATGGTT  | 2273             | 2555   | 2570     | 2421     | downregulated                             |                  | downregulated                      |
| hsa-let-7c-3p_R-1         | CTGTACAACCTTCTAGCTTTC   | 7                | 0      | 6        | 0        |                                           |                  |                                    |
| hsa-let-7b-5p             | TGAGGTAGTAGGTTGTGTGGTT  | 82701            | 116853 | 81208    | 48587    | downregulated                             |                  | downregulated                      |
| hsa-let-7b-3p_R-1_1ss21CT | CTATACAACCTACTGCCTTCT   | 3748             | 2485   | 1170     | 602      |                                           |                  |                                    |
| hsa-miR-10b-5p_R-1        | TACCCTGTAGAACCGAATTTGT  | 183              | 123    | 70       | 88       | upregulated                               |                  |                                    |
| hsa-miR-16-5p             | TAGCAGCACGTAAATATTGGCG  | 7284             | 7890   | 12245    | 13131    |                                           |                  |                                    |
| hsa-miR-16-1-3p           | CCAGTATTAAGTGTCTGCTGA   | 0                | 0      | 23       | 69       | upregulated                               |                  | upregulated                        |
| hsa-miR-16-2-3p_L+1R-1    | ACCAATATTACTGTGCTGCTTT  | 221              | 392    | 564      | 694      |                                           |                  | upregulated                        |
| hsa-miR-18a-5p            | TAAGGTGCATCTAGTGCAGATAG | 82               | 91     | 794      | 714      | upregulated                               | downregulated    | upregulated                        |
| hsa-miR-18a-3p_R-2        | ACTGCCCTAAGTGCTCCTTCT   | 140              | 171    | 49       | 44       |                                           |                  | upregulated                        |
| hsa-miR-19a-3p            | TGTGCAAATCTATGCAAACTGA  | 196              | 291    | 1394     | 1409     | downregulated                             |                  |                                    |
| hsa-miR-20a-5p            | TAAAGTGCTTATAGTGCAGGTAG | 4964             | 3870   | 31801    | 31944    | downregulated                             |                  | downregulated                      |
| hsa-miR-20a-3p            | ACTGCATTATGAGCACTAAAG   | 17               | 25     | 155      | 114      |                                           |                  |                                    |
| hsa-miR-20b-5p            | CAAAGTGCTCATAGTGCAGGTAG | 0                | 0      | 36       | 54       | upregulated                               |                  | upregulated                        |
| hsa-miR-21-5p             | TAGCTTATCAGACTGATGTTGA  | 167598           | 225677 | 1216907  | 773412   | upregulated                               |                  |                                    |
| hsa-miR-21-3p_R+1         | CAACACCAGTCGATGGGCTGTC  | 123              | 188    | 2935     | 2382     |                                           |                  | upregulated                        |
| hsa-miR-25-5p_R+2         | AGGCGGAGACTTGGCAATTGCT  | 35               | 42     | 28       | 43       | upregulated                               |                  | upregulated                        |
| hsa-miR-25-3p             | CATTGCCTTGTCTCGGCTGTA   | 24937            | 34050  | 24624    | 23471    |                                           |                  |                                    |
| hsa-miR-29c-5p_R-1        | TGACCGATTCTCCTGGTGTT    | 672              | 542    | 1325     | 1091     | upregulated                               |                  | upregulated                        |

|                        |                         |        |        |        |        |               |               |               |
|------------------------|-------------------------|--------|--------|--------|--------|---------------|---------------|---------------|
| hsa-miR-29c-3p_R-1     | TAGCACCATTTGAAATCGGTT   | 2999   | 5933   | 15753  | 7487   |               |               |               |
| hsa-miR-30a-5p         | TGTAAACATCCTCGACTGGAAG  | 143946 | 97103  | 178925 | 183651 | downregulated |               | downregulated |
| hsa-miR-30a-3p_1ss22CT | CTTTCAGTCGGATGTTTGCACT  | 3262   | 3163   | 3579   | 5699   |               |               |               |
| hsa-miR-30b-5p         | TGTAAACATCCTACACTCAGCT  | 383303 | 264659 | 372314 | 346935 | downregulated |               | downregulated |
| hsa-miR-34a-5p_R+1     | TGGCAGTGTCTTAGCTGGTTGTT | 95     | 113    | 1263   | 1481   |               | upregulated   |               |
| hsa-miR-34a-3p_R+1     | CAATCAGCAAGTATACTGCCTT  | 0      | 0      | 0      | 8      | downregulated |               | upregulated   |
| hsa-miR-34c-5p         | AGGCAGTGTAGTTAGCTGATTGC | 0      | 0      | 6      | 42     |               |               |               |
| hsa-miR-34c-3p         | AATCACTAACCCACACGGCCAGG | 0      | 6      | 0      | 0      |               |               |               |
| hsa-miR-92a-1-5p       | AGGTTGGGATCGGTTGCAATGCT | 25     | 66     | 25     | 35     |               |               | upregulated   |
| hsa-miR-92a-3p         | TATTGCACTGTCCCGCCTGT    | 71133  | 52695  | 36108  | 24183  | downregulated | upregulated   | downregulated |
| hsa-miR-92a-2-5p       | GGGTGGGATTGTTGCATTAC    | 7      | 0      | 0      | 0      |               |               | upregulated   |
| hsa-miR-103a-2-5p      | AGCTTCTTACAGTGCTGCCTTG  | 36     | 7      | 53     | 43     |               |               | upregulated   |
| hsa-miR-103a-3p        | AGCAGCATTGTACAGGGCTATGA | 38638  | 22562  | 35255  | 76850  |               | upregulated   |               |
| hsa-miR-122-5p_R-1     | TGGAGTGTGACAATGGTGT     | 0      | 156    | 0      | 29     | upregulated   |               | upregulated   |
| hsa-miR-125b-5p_R-1    | TCCCTGAGACCCTAACTTGTG   | 29145  | 29131  | 18317  | 8758   |               |               |               |
| hsa-miR-125b-2-3p_L-2  | ACAAGTCAGGCTCTTGGGAC    | 937    | 560    | 444    | 336    | upregulated   |               | upregulated   |
| hsa-miR-125b-1-3p      | ACGGGTTAGGCTCTTGGGAGCT  | 10     | 25     | 10     | 10     |               |               | upregulated   |
| hsa-miR-126-5p_R+1     | CATTATTACTTTTGGTACGCGA  | 0      | 0      | 7      | 23     |               |               |               |
| hsa-miR-126-3p         | TCGTACCGTGAGTAATAATGCG  | 48     | 76     | 70     | 193    | downregulated | upregulated   | upregulated   |
| hsa-miR-133a-3p_L-1R+1 | TTGGTCCCTTCAACCAGCTGT   | 8      | 4      | 7      | 2      | downregulated | upregulated   | upregulated   |
| hsa-miR-139-5p         | TCTACAGTGCACGTGTCTCCAGT | 0      | 9      | 22     | 10     | downregulated |               |               |
| hsa-miR-141-3p_R-1     | TAACACTGTCTGGTAAAGATG   | 45058  | 66296  | 119600 | 65598  | downregulated |               | downregulated |
| hsa-miR-143-5p_1ss22TA | GGTGCAGTGTCATCTCTGGA    | 39     | 50     | 207    | 151    |               |               |               |
| hsa-miR-143-3p_R+1     | TGAGATGAAGCACTGTAGCTCT  | 2268   | 4251   | 12322  | 18655  | downregulated |               | downregulated |
| hsa-miR-145-5p         | GTCCAGTTTCCCAGGAATCCCT  | 138    | 168    | 112    | 367    |               |               | upregulated   |
| hsa-miR-145-3p         | GGATTCTGGAAATACTGTCT    | 8      | 22     | 58     | 103    |               | upregulated   | upregulated   |
| hsa-miR-148a-3p        | TCAGTGCACACTACAGAACTTGT | 386987 | 588485 | 918411 | 876058 | downregulated |               | downregulated |
| hsa-miR-148b-5p_L+1R-1 | GAAGTCTGTATACACTCAGG    | 870    | 649    | 598    | 1076   |               |               | upregulated   |
| hsa-miR-148b-3p_R-1    | TCAGTGCATCACAGAACTTGT   | 20149  | 21809  | 40891  | 61755  |               | downregulated | downregulated |
| hsa-miR-155-5p_R-1     | TTAATGCTAATCGTGATAGGGGT | 39     | 81     | 1697   | 1390   |               | upregulated   | upregulated   |
| hsa-miR-155-3p         | CTCCTACATATTAGCATTAAACA | 0      | 0      | 5      | 4      |               |               | upregulated   |
| hsa-miR-181a-5p_R-1    | AACATTCAACGCTGTCGGTGAG  | 24468  | 26168  | 17747  | 14616  | downregulated | upregulated   | downregulated |
| hsa-miR-182-5p_R-2     | TTGGCAATGGTAGAACTCACA   | 29344  | 16727  | 23348  | 40420  |               | upregulated   |               |
| hsa-miR-182-3p_L+2R-1  | GGTGGTTCTAGACTTGCCAACT  | 62     | 28     | 76     | 79     |               |               | upregulated   |
| hsa-miR-191-5p_R-1     | CAACGGAATCCCAAAGCAGCT   | 221594 | 117554 | 51911  | 87488  |               | upregulated   |               |
| hsa-miR-191-3p_R-3     | GCTGCGCTTGGATTTCGTC     | 30     | 14     | 7      | 0      |               |               | upregulated   |
| hsa-miR-192-5p         | CTGACCTATGAATTGACAGCC   | 671    | 503    | 1714   | 2494   |               | upregulated   | upregulated   |
| hsa-miR-192-3p_R+1     | CTGCCAATCCATAGGTCACAGT  | 0      | 0      | 0      | 4      |               |               | upregulated   |
| hsa-miR-195-5p_R+1     | TAGCAGCACAGAAATATTGGCA  | 1000   | 774    | 3561   | 1953   |               | upregulated   | upregulated   |
| hsa-miR-195-3p_R-2     | CCAATATTGGCTGTGCTGCT    | 50     | 42     | 43     | 40     |               |               | upregulated   |
| hsa-miR-199a-5p_R-1    | CCCAGTGTTACAGACTACCTGTT | 22     | 23     | 20     | 19     |               | upregulated   | upregulated   |
| hsa-miR-199a-3p_R-1    | ACAGTAGTCTGCACATTGGTT   | 642    | 716    | 717    | 1711   |               |               | upregulated   |
| hsa-miR-200c-5p        | CGTCTTACCAGCAGTGTGG     | 18     | 6      | 65     | 25     |               | upregulated   | upregulated   |
| hsa-miR-200c-3p        | TAATACTGCCGGTAATGATGGA  | 764438 | 473643 | 254207 | 253470 | upregulated   | downregulated | downregulated |

|                        |                         |        |        |        |        |  |               |               |
|------------------------|-------------------------|--------|--------|--------|--------|--|---------------|---------------|
| hsa-miR-200b-5p        | CATCTTACTGGGCAGCATTGGA  | 5836   | 6310   | 2957   | 2449   |  |               | upregulated   |
| hsa-miR-200b-3p        | TAATACTGCCTGGTAATGATGA  | 354432 | 251845 | 266377 | 258231 |  | upregulated   | downregulated |
| hsa-miR-200a-5p        | CATCTTACCGGACAGTGCTGGA  | 2598   | 1846   | 1627   | 2221   |  |               | upregulated   |
| hsa-miR-200a-3p_R+1    | TAACACTGTCTGGTAACGATGTT | 345502 | 350091 | 385973 | 393857 |  | upregulated   | downregulated |
| hsa-miR-202            |                         | 0      | 0      | 0      | 0      |  | upregulated   | upregulated   |
| hsa-miR-203a-3p        | GTGAAATGTTTAGGACCACTAG  | 797    | 2044   | 3199   | 1505   |  | upregulated   | upregulated   |
| hsa-miR-205-5p         | TCCTTCAATCCACCGGAGTCTG  | 15626  | 21105  | 19760  | 8789   |  |               | downregulated |
| hsa-miR-205-3p_L-1R+1  | ATTTCACTGGAGTGAAGTTCA   | 0      | 13     | 12     | 0      |  | downregulated |               |
| hsa-miR-210-5p_R-1     | AGCCCCTGCCACCGCACACT    | 58     | 132    | 34     | 20     |  | upregulated   | upregulated   |
| hsa-miR-210-3p         | CTGTGCGTGTGACAGCGGCTGA  | 515    | 1797   | 4409   | 1792   |  |               | upregulated   |
| hsa-miR-215-5p_R+1     | ATGACCTATGAATTGACAGACA  | 0      | 0      | 18     | 26     |  | upregulated   | upregulated   |
| hsa-miR-222-p5         | AAGGTGTAGGTACCCTCAAT    | 0      | 0      | 8      | 16     |  | upregulated   | upregulated   |
| hsa-miR-222-3p_R+2     | AGCTACATCTGGCTACTGGGTCT | 679    | 783    | 2627   | 2580   |  |               | upregulated   |
| hsa-miR-299            |                         | 0      | 0      | 0      | 0      |  | upregulated   | upregulated   |
| hsa-miR-320d_R-1       | AAAAGCTGGGTTGAGAGG      | 186    | 139    | 62     | 18     |  | upregulated   | upregulated   |
| hsa-miR-320b_R-2       | AAAAGCTGGGTTGAGAGGGC    | 1206   | 817    | 276    | 252    |  |               | upregulated   |
| hsa-miR-324-5p_R-1     | CGCATCCCTAGGGCATTGGT    | 274    | 370    | 614    | 783    |  | upregulated   | upregulated   |
| hsa-miR-324-3p_L-3R+1  | ACTGCCCCAGGTGCTGTGGT    | 313    | 881    | 288    | 182    |  |               | upregulated   |
| hsa-miR-335-5p_R-2     | TCAAGAGCAATAACGAAAAAT   | 27462  | 21489  | 35648  | 31513  |  | downregulated | downregulated |
| hsa-miR-342-5p_R+1     | AGGGGTGCTATCTGTGATTGAG  | 228    | 204    | 114    | 54     |  | downregulated |               |
| hsa-miR-342-3p         | TCTCACACAGAAATCGCACCCGT | 6948   | 7060   | 4489   | 5121   |  |               | downregulated |
| hsa-miR-365b-5p_L+1R-2 | GAGGGACTTTCAGGGGCAGCT   | 33     | 274    | 5      | 0      |  |               |               |
| hsa-miR-365b-3p        | TAATGCCCTAAAAATCCTTAT   | 12813  | 10465  | 6151   | 8229   |  | downregulated | downregulated |
| hsa-miR-365a-5p_R-3    | AGGGACTTTTGGGGGCAGAT    | 36     | 118    | 0      | 14     |  |               |               |
| hsa-miR-373            |                         | 0      | 0      | 0      | 0      |  | upregulated   | upregulated   |
| hsa-miR-375-5p         | GCGACGAGCCCTCGCACAAACC  | 19     | 12     | 0      | 0      |  | upregulated   | downregulated |
| hsa-miR-375-3p         | TTTGTTCGTTCGGCTCGCGTGA  | 170762 | 305772 | 53533  | 42830  |  |               | downregulated |
| hsa-miR-376c           |                         | 0      | 0      | 0      | 0      |  | upregulated   | upregulated   |
| hsa-miR-382-5p         | GAAGTTGTTTCGGTGGATTTCG  | 17     | 0      | 0      | 10     |  | upregulated   | upregulated   |
| hsa-miR-382-3p_R+1     | AATCAATTCACGGACAACACTTT | 0      | 0      | 0      | 4      |  |               | upregulated   |
| hsa-miR-409-5p_R-1     | AGGTTACCCGAGCAACTTTGCA  | 14     | 0      | 0      | 23     |  | upregulated   | upregulated   |
| hsa-miR-409-3p_L+1     | CGAATGTGCTCGGTGAACCCCT  | 0      | 0      | 0      | 6      |  |               | upregulated   |
| hsa-miR-425-5p         | AATGACACGATCACTCCCGTTGA | 7590   | 6681   | 2323   | 3182   |  | upregulated   |               |
| hsa-miR-425-3p_L+1R-1  | CATCGGGAATGTCGTGTCGCC   | 1157   | 1007   | 629    | 752    |  |               |               |
| hsa-miR-451a_R-1       | AAACCGTTACCATTACTGAGT   | 4331   | 6033   | 3030   | 806    |  | upregulated   |               |
| hsa-miR-497-5p         | CAGCAGCACACTGTGGTTTGT   | 170    | 598    | 1645   | 879    |  | downregulated |               |
| hsa-miR-523-3p_L-1R-2  | AACGCGCTTCCCTATAGAGG    | 11     | 19     | 8      | 0      |  | upregulated   | upregulated   |
| hsa-miR-526b-5p_R-1    | CTCTTGAGGGAAGCACTTTCTG  | 7      | 25     | 32     | 14     |  | upregulated   | upregulated   |
| hsa-miR-625-5p_R-1     | AGGGGGAAAAGTTCTATAGTC   | 7      | 0      | 15     | 12     |  | upregulated   | upregulated   |
| hsa-miR-625-3p         | GACTATAGAACTTCCCCCTCA   | 162    | 58     | 46     | 28     |  |               | upregulated   |
| hsa-miR-628-5p_R-1     | ATGCTGACATATTTACTAGAG   | 26     | 48     | 233    | 223    |  | upregulated   | upregulated   |
| hsa-miR-628-3p_R+1     | TCTAGTAAGAGTGGCAGTCGAA  | 137    | 171    | 106    | 112    |  |               | upregulated   |
| hsa-miR-652-3p_R+1     | AATGGCGCCACTAGGGTTGTGA  | 6220   | 4833   | 2953   | 3025   |  | downregulated |               |
| hsa-miR-744-5p         | TGCGGGGCTAGGGCTAACAGCA  | 820    | 462    | 480    | 1050   |  | downregulated |               |

|                            |                        |     |     |     |     |               |             |
|----------------------------|------------------------|-----|-----|-----|-----|---------------|-------------|
| hsa-miR-744-3p_R-1_1ss21CT | CTGTTGCCACTAACCTCAACT  | 15  | 14  | 6   | 0   |               |             |
| hsa-miR-801                |                        | 0   | 0   | 0   | 0   | upregulated   | upregulated |
| hsa-miR-1287-5p_R-2        | TGCTGGATCAGTGGTTCGAG   | 203 | 455 | 418 | 260 | downregulated |             |
| hsa-miR-1287-3p            | CTCTAGCCACAGATGCAGTGAT | 0   | 16  | 5   | 0   |               |             |

## 154 References

- 155 1. Martin M: **Cutadapt removes adapter sequences from high-throughput sequencing reads.** *2011*  
156 2011, **17**(1):3.
- 157 2. Chen H, Smith AD, Chen T: **WALT: fast and accurate read mapping for bisulfite sequencing.**  
158 *Bioinformatics (Oxford, England)* 2016, **32**(22):3507-3509.
- 159 3. Li H, Handsaker B, Wysoker A, Fennell T, Ruan J, Homer N, Marth G, Abecasis G, Durbin R: **The**  
160 **Sequence Alignment/Map format and SAMtools.** *Bioinformatics (Oxford, England)* 2009,  
161 **25**(16):2078-2079.
- 162 4. Song Q, Decato B, Hong EE, Zhou M, Fang F, Qu J, Garvin T, Kessler M, Zhou J, Smith AD: **A**  
163 **reference methylome database and analysis pipeline to facilitate integrative and comparative**  
164 **epigenomics.** *PloS one* 2013, **8**(12):e81148.
- 165 5. Akalin A, Kormaksson M, Li S, Garrett-Bakelman FE, Figueroa ME, Melnick A, Mason CE:  
166 **methylKit: a comprehensive R package for the analysis of genome-wide DNA methylation**  
167 **profiles.** *Genome biology* 2012, **13**(10):R87.
- 168 6. Chiu RW, Akolekar R, Zheng YW, Leung TY, Sun H, Chan KC, Lun FM, Go AT, Lau ET, To WW  
169 *et al*: **Non-invasive prenatal assessment of trisomy 21 by multiplexed maternal plasma DNA**  
170 **sequencing: large scale validity study.** *BMJ (Clinical research ed)* 2011, **342**:c7401.
- 171 7. Yoon S, Xuan Z, Makarov V, Ye K, Sebat J: **Sensitive and accurate detection of copy number**  
172 **variants using read depth of coverage.** *Genome research* 2009, **19**(9):1586-1592.
- 173 8. Ginestet C: **ggplot2: Elegant Graphics for Data Analysis by H. Wickham.** *Journal of the Royal*  
174 *Statistical Society* 2011, **174**(1):245-246.
- 175 9. Nepomnyashchaya YN, Artemov AV, Roumiantsev SA, Roumyantsev AG, Zhavoronkov A:  
176 **Non-invasive prenatal diagnostics of aneuploidy using next-generation DNA sequencing**  
177 **technologies, and clinical considerations.** *Clinical chemistry and laboratory medicine* 2013,  
178 **51**(6):1141-1154.
